# Supplementary material
Source: ML conference proceedings conference paper supplement (https://proceedings.mlr.press/v97/yuan19c.html)
Supplement: Supplementary file 1 [file yuan19c-supp.pdf]

## A. Preliminaries of Differential Inclusion

Recall that we denote  $F(x) = f(x) + g(Ax)$ , and Assumption 4 holds. To transit from the smooth case to the nonsmooth case, we use the tool of differential inclusion to build the connection between subdifferentiable  $F$  and differentiable functions. One basic example of a differential inclusion takes the form of:

$$\dot{x}(t) \in \partial F(x(t))$$

To bridge the gap between differentiable objective functions and nondifferentiable objective functions, we follow Vassilis et al. (2018) and consider the Moreau-Yosida Approximation, which is a standard tool in convex analysis.

**Definition 15** (Moreau-Yosida Approximation). *Moreau-Yosida Approximation of a convex function  $F$  with parameter  $\mu > 0$  is defined as*

$$F_\mu(x) := \inf_y \left\{ F(y) + \frac{1}{2\mu} \|y - x\|_2^2 \right\}$$

Use  $J_\mu(x)$  to denote the unique point that achieves the infimum above, then  $\nabla F_\mu(x) = \frac{1}{\mu}(x - J_\mu(x))$  by the Envelope Theorem (Afriat, 1971; Takayama, 1985). For any  $\mu > 0$ ,  $F_\mu$  is a convex, continuously differentiable function.

We take the Definition 3.1 in Vassilis et al. (2018) of a shock solution to define a solution of a differential inclusion. The existence of a shock solution are described in Section 3 of Vassilis et al. (2018). More specifically, we can build a sequence  $x_\mu(t)$  such that its subsequence converges, where  $x_\mu(t)$  are the solutions to the Approximate Differential Equation (ADE) defined below:

### Approximate Differential Equation (ADE)

We consider the Moreau-Yosida approximation  $F_\mu(x)$  of the objective  $F(x)$  with  $\mu > 0$ . We consider the following approximating ODE:

$$\begin{cases} \dot{x}_\mu(t) + \nabla F_\mu(x_\mu(t)) = 0 \\ x_\mu(0) = x_0 \end{cases}$$

Here  $\nabla F_\mu$  can approximate  $\partial F$  and  $F_\mu$  is differentiable as is shown in the theory of Moreau-Yosida approximation.

The convergence to a shock solution is described as the Approximation Scheme ( $\mathcal{AS}$ ):

### Approximation Scheme ( $\mathcal{AS}$ )

Let  $\{F_\mu\}_{\mu>0}$  be a family of functions such that  $F_\mu$  is the Moreau-Yosida approximation of  $F$  for all  $\mu > 0$ . Then there exists a subsequence  $\{x_\mu\}_{\mu>0}$  of solutions of (ADE) that converges to a shock solution  $x$  of differential inclusion in the following sense:

- $x_\mu \rightarrow x$  uniformly on  $[0, T]$  for all  $T > 0$  as  $\mu \rightarrow 0$
- $\dot{x}_\mu \rightarrow \dot{x}$  in  $L^p([0, T]; \mathbb{R}^d)$  for all  $p \in [1, \infty)$  for all  $T > 0$  as  $\mu \rightarrow 0$
- $F_\mu(x_\mu) \rightarrow F(x)$  in  $L^p([0, T]; \mathbb{R}^d)$  for all  $p \in [1, \infty)$  for all  $T > 0$  as  $\mu \rightarrow 0$

## B. Proofs of the Theorems Related to Linearized ADMM and Gradient-Based ADMM

In this following sections, we prove the main results provided in Section 2.1. Sections B.1, B.2 and B.3 prove Theorems 5, 6 and 8, respectively.

**B.1. Proof of Theorem 5**

*Proof of Theorem 5.* Due to the strong convexity of the optimization subproblems (5a) and (5b), it is easy to verify that the sequence  $\{x_k, z_k, u_k\}$  is unique. We have from the first-order optimality conditions of (5a) and (5b) that

$$0 \in \partial f(x_{k+1}) + \tau_L \left[ x_{k+1} - \left( x_k - \frac{\rho}{\tau_L} A^\top (Ax_k - z_k + u_k) \right) \right], \quad (14a)$$

$$0 \in \frac{1}{\rho} \partial g(z_{k+1}) - (\alpha Ax_{k+1} + (1 - \alpha)z_k - z_{k+1} + u_k). \quad (14b)$$

We detail the proof in the following:

- (i) Adding up (14b) and (5c) eliminates the common term  $(\alpha Ax_{k+1} + (1 - \alpha)z_k - z_{k+1} + u_k)$  and reduces to a simple  $u$ -update:

$$u_{k+1} \in \frac{1}{\rho} \partial g(z_{k+1}). \quad (15)$$

Taking the continuous limit  $\rho \rightarrow \infty$  gives  $U(t) = 0$ , and hence  $\dot{U}(t) = 0$ .<sup>5</sup>

- (ii) Reorganize (14a) into the following form:

$$0 \in \partial f(x_{k+1}) + \tau_L(x_{k+1} - x_k) + \rho A^\top (Ax_k - z_k + u_k). \quad (16)$$

Bringing (15) into (16) leads to:

$$0 \in \partial f(x_{k+1}) + A^\top \partial g(z_k) + \tau_L(x_{k+1} - x_k) + \rho A^\top (Ax_k - z_k). \quad (17)$$

Again from (5c),

$$\begin{aligned} u_{k+1} - u_k &= \alpha Ax_{k+1} + (1 - \alpha)z_k - z_{k+1} \\ &= \alpha A(x_{k+1} - x_k) - (z_{k+1} - z_k) + \alpha(Ax_k - z_k), \end{aligned}$$

and hence

$$Ax_k - z_k = \frac{1}{\alpha} [(u_{k+1} - u_k) + (z_{k+1} - z_k)] - A(x_{k+1} - x_k). \quad (18)$$

Plugging (18) into (17) gives

$$0 \in \partial f(x_{k+1}) + A^\top \partial g(z_k) + \tau_L(x_{k+1} - x_k) + \rho A^\top \left( \frac{1}{\alpha} [(u_{k+1} - u_k) + (z_{k+1} - z_k)] - A(x_{k+1} - x_k) \right). \quad (19)$$

Taking the limit  $\rho \rightarrow \infty$  and letting  $\tau_L/\rho \rightarrow c$ , using the fact that  $\dot{U}(t) = 0$ , (19) reduces to

$$0 \in \partial f(X(t)) + A^\top \partial g(Z(t)) + (cI - A^\top A) \dot{X}(t) + \frac{1}{\alpha} A^\top \dot{Z}(t). \quad (20)$$

- (iii) We directly take the  $\rho \rightarrow \infty$  limit in (5c) with the fact that  $u_{k+1} \rightarrow u_k$  and  $z_{k+1} \rightarrow z_k$ , we conclude

$$Z(t) = AX(t), \quad \dot{Z}(t) = A\dot{X}(t).$$

It is straightforward to check that

$$\partial f(X(t)) + A^\top \partial g(Z(t)) \subseteq \partial F(X(t)) \quad (21)$$

Combining the above and (20) concludes

$$0 \in \partial F(X(t)) + \left( cI + \frac{1 - \alpha}{\alpha} A^\top A \right) \dot{X}(t),$$

This completes the proof. □

<sup>5</sup>Although the continuous version of  $U(t)$  is constantly zero, it is different with  $u_k = 0$ . One may regard  $u_k$  as an infinitesimal number that dynamically changes in the system.

## B.2. Proof of Theorem 6

*Proof of Theorem 6.* Again the sequence  $\{x_k, z_k, u_k\}$  is unique due to the strong convexity of the optimization subproblem (5a) and (5b). It follows from the optimality conditions that

$$0 = \nabla f(x_k) + \rho A^T(Ax_k - z_k + u_k) + \tau_G(x_{k+1} - x_k), \quad (22a)$$

$$0 \in \partial g(z_{k+1}) - \rho(\alpha Ax_{k+1} + (1 - \alpha)z_k - z_{k+1} + u_k), \quad (22b)$$

$$u_{k+1} = u_k + (\alpha Ax_{k+1} + (1 - \alpha)z_k - z_{k+1}). \quad (22c)$$

Seeing  $\tau_L$  in the place of  $\tau_G$ , (22b) and (22c) are identical to (14b) and (5c), while (22a) is identical to (14a) with  $\partial f(x_{k+1})$  replaced by  $\nabla f(x_k)$ .

Carrying out the proof of Theorem 5 in §B.1 gives (19) with  $\partial f(x_{k+1})$  replaced by  $\nabla f(x_k)$ , and hence taking corresponding limits gives differential inclusion (20) with  $\partial f(X(t))$  replaced by  $\nabla f(X(t))$ . The rest of the proof follows in the same fashion as Part (iii) in the proof of Theorem 5.  $\square$

## B.3. Proof of Theorem 8

*Proof of Theorem 8.* For notation simplicity, we choose a matrix  $B$  such that  $B^T B = cI + \frac{1-\alpha}{\alpha} A^T A$ . Recall that the largest and smallest singular value of  $B$  are  $\kappa_1$  and  $\kappa_d$ . Note that when  $0 < \alpha \leq 1$ ,  $\kappa_1 = \sqrt{c + \frac{1-\alpha}{\alpha} \sigma_1^2}$  and  $\kappa_d = \sqrt{c + \frac{1-\alpha}{\alpha} \sigma_d^2}$ , and when  $1 < \alpha < 2$ ,  $\kappa_1 = \sqrt{c + \frac{1-\alpha}{\alpha} \sigma_d^2}$  and  $\kappa_d = \sqrt{c + \frac{1-\alpha}{\alpha} \sigma_1^2}$ , where  $\sigma_1, \sigma_d$  are singular value of matrix  $A$ . Then the original differential inclusion becomes  $0 \in \partial F(X(t)) + (B^T B)\dot{X}(t)$ . Because Moreau-Yosida approximation  $F_\mu(X_\mu(t))$  is a continuously differentiable, convex function for all  $\mu > 0$ , we denote an arbitrary minimizer as  $x_\mu^*$ .

For each  $\mu > 0$ , consider the energy functional of Moreau-Yosida approximation defined as

$$\mathcal{E}_\mu(t) = t(F_\mu(X_\mu(t)) - F_\mu(x_\mu^*)) + \frac{\lambda}{2} \|B(X_\mu(t) - x_\mu^*)\|_2^2, \quad (23)$$

where  $\lambda$  is an arbitrary constant greater than or equal to 1. Because  $F_\mu$  is a continuously differentiable function, we could write the time derivative of  $\mathcal{E}_\mu(t)$  as

$$\dot{\mathcal{E}}_\mu(t) = (F_\mu(X_\mu(t)) - F_\mu(x_\mu^*)) + t\langle \nabla F_\mu(X_\mu(t)), \dot{X}_\mu(t) \rangle + \lambda \langle B^T B(X_\mu(t) - x_\mu^*), \dot{X}_\mu(t) \rangle. \quad (24)$$

By substituting  $B^T B\dot{X}_\mu(t)$  by  $-\nabla F_\mu(X_\mu(t))$  and  $\nabla F_\mu(X_\mu(t))$  by  $-B^T B\dot{X}_\mu(t)$  according to (9) and the definition of the shock solution  $X_\mu(t)$  in Appendix A, we have

$$\dot{\mathcal{E}}_\mu(t) = -t\|B\dot{X}_\mu(t)\|_2^2 + (F_\mu(X_\mu(t)) - F_\mu(x_\mu^*)) - \lambda \langle (X_\mu(t) - x_\mu^*), \nabla F_\mu(X_\mu(t)) \rangle \leq 0, \quad (25)$$

where we used the convexity of  $F_\mu$  and nonnegativity of  $(F_\mu(X_\mu) - F_\mu(x_\mu^*)), \|B\dot{X}_\mu\|_2$  in the last inequality.

Similar to  $\mathcal{E}_\mu(t)$ , we define the energy functional for  $F(X(t))$  as

$$\mathcal{E}(t) = t(F(X(t)) - F(x^*)) + \frac{\lambda}{2} \|B(X(t) - x^*)\|_2^2. \quad (26)$$

At time  $t = 0$ , there is an upper bound on  $\mathcal{E}(0)$  as

$$\mathcal{E}(0) = \frac{\lambda}{2} \|B(x_0 - x^*)\|_2^2 \leq \frac{\lambda \kappa_1^2}{2} \|x_0 - x^*\|_2^2. \quad (27)$$

By applying the approximation scheme ( $\mathcal{AS}$ ) argument (details as in Appendix A) as  $\mu \rightarrow 0$ , we have for a.e.  $t \geq 0$  that  $\mathcal{E}(t) \leq \mathcal{E}(0)$ .

By non-negativity of  $F(X) - F(x^*)$  in (26), we find

$$\frac{\lambda \kappa_d^2}{2} \|(X(t) - x^*)\|_2^2 \leq \mathcal{E}(0). \quad (28)$$

Combining with the upper bound of  $\mathcal{E}(0)$  in (27), we derive for a.e.  $t \geq 0$  that

$$\|X(t) - x^*\|_2 \leq \frac{\kappa_1}{\kappa_d} \|x_0 - x^*\|_2. \quad (29)$$

Using the nonnegativity of all terms in (26) and monotonicity of  $\mathcal{E}(t)$  on a.e.  $t \geq 0$ , we have, for a.e.  $t \geq 0$ ,

$$t(F(X(t)) - F(x^*)) \leq \mathcal{E}(t) \leq \mathcal{E}(0) \leq \frac{\lambda \kappa_1^2}{2} \|x_0 - x^*\|_2^2 \quad (30)$$

Choosing  $\lambda = 1$ , we have the following result, for a.e.  $t \geq 0$ ,

$$F(X(t)) - F(x^*) \leq \mathcal{E}(t) \leq \mathcal{E}(0) \leq \frac{\kappa_1^2}{2t} \|x_0 - x^*\|_2^2 \quad (31)$$

By applying convexity of  $F_\mu$  to (25), we have

$$\dot{\mathcal{E}}_\mu(t) \leq (1 - \lambda)(F_\mu(X_\mu(t)) - F_\mu(x_\mu^*)) - t\|B\dot{X}_\mu(t)\|_2^2. \quad (32)$$

Notice that the two terms in (32) are all negative, we find

$$F_\mu(X_\mu(t)) - F_\mu(x_\mu^*) \leq \frac{-\dot{\mathcal{E}}_\mu(t)}{\lambda - 1} \quad \text{and} \quad t\|\dot{X}_\mu(t)\|_2^2 \leq -\frac{\dot{\mathcal{E}}_\mu(t)}{\kappa_d^2}. \quad (33)$$

By integrating over  $(0, T)$ , the inequalities above give for all  $T > 0$  that

$$\int_0^T (F_\mu(X_\mu(t)) - F_\mu(x_\mu^*)) dt \leq \frac{\mathcal{E}_\mu(0)}{\lambda - 1}, \quad \int_0^T t\|\dot{X}_\mu(t)\|_2^2 dt \leq \frac{\mathcal{E}_\mu(0)}{\kappa_d^2}. \quad (34)$$

By applying approximation scheme (AS), taking limit  $T \rightarrow \infty$ , choosing  $\lambda \rightarrow \infty$  and  $\lambda = 1$  respectively, and plugging in (27), we have

$$\int_0^\infty (F(X_\mu(t)) - F(x^*)) dt \leq \frac{\kappa_1^2}{2} \|x_0 - x^*\|_2^2, \quad \int_0^\infty t\|\dot{X}(t)\|_2^2 dt \leq \frac{\kappa_1^2}{2\kappa_d^2} \|x_0 - x^*\|_2^2. \quad (35)$$

□

## C. Proofs of the Theorems Related to G-ADMM and the Accelerated G-ADMM

### C.1. Proof of Theorem 9

*Proof of Theorem 9.* Proof of Theorem 9 uses idea similar to the proof of Theorem 5 to analyze G-ADMM updates. By strong convexity of the optimization subproblems (10a) and (10b), we could verify that the sequence  $\{x_k, z_k, u_k\}$  is unique. Together with (10c), we have from the first-order optimality conditions of (10a) and (10b) that

$$\partial f(x_{k+1}) + \rho A^T (Ax_{k+1} - z_k + u_k) \ni 0, \quad (36a)$$

$$\frac{1}{\rho} \partial g(z_{k+1}) - (\alpha Ax_{k+1} + (1 - \alpha)z_k - z_{k+1} + u_k) \ni 0, \quad (36b)$$

$$u_{k+1} - (\alpha Ax_{k+1} + (1 - \alpha)z_k - z_{k+1} + u_k) = 0. \quad (36c)$$

Adding up (36b) and (36c) eliminates the common term  $(\alpha Ax_{k+1} + (1 - \alpha)z_k - z_{k+1} + u_k)$  and reduces to a simple  $u$ -update:

$$u_{k+1} \in \frac{1}{\rho} \partial g(z_{k+1}). \quad (37)$$

Taking the continuous limit  $\rho \rightarrow \infty$  gives  $U(t) = 0$ , and hence  $\dot{U}(t) = 0$ .

Bringing (37) into (36a) leads to:

$$0 \in \partial f(x_{k+1}) + A^\top \partial g(z_k) + \rho A^\top (Ax_{k+1} - z_k), \quad (38)$$

where again from (36c),

$$u_{k+1} - u_k = \alpha(Ax_{k+1} - z_k) - (z_{k+1} - z_k),$$

and hence

$$Ax_{k+1} - z_k = \frac{1}{\alpha}[(u_{k+1} - u_k) + (z_{k+1} - z_k)] \quad (39)$$

Plugging (39) into (38) gives

$$0 \in \partial f(x_{k+1}) + A^\top \partial g(z_k) + \rho A^\top \left( \frac{1}{\alpha}[(u_{k+1} - u_k) + (z_{k+1} - z_k)] \right). \quad (40)$$

Taking the limit  $\rho \rightarrow \infty$ , using the fact that  $\dot{U}(t) = 0$ , (40) reduces to

$$0 \in \partial f(X(t)) + A^\top \partial g(Z(t)) + \frac{1}{\alpha} A^\top (\dot{Z}(t)). \quad (41)$$

We directly take the  $\rho \rightarrow \infty$  limit in (36c) and conclude

$$Z(t) = AX(t), \quad \dot{Z}(t) = A\dot{X}(t).$$

Recalling (21) and combining the above with (41) concludes

$$0 \in \partial F(X(t)) + \left( \frac{1}{\alpha} A^\top A \right) \dot{X}(t),$$

Thus we complete the proof. □

## C.2. Proof of Theorem 10

*Proof of Theorem 10.* For each  $\mu > 0$ , consider the energy functional of Moreau-Yosida approximation defined as

$$\mathcal{E}_\mu(t) = \alpha t (F_\mu(X_\mu(t)) - F_\mu(x_\mu^*)) + \frac{\lambda}{2} \|A(X_\mu(t) - x_\mu^*)\|_2^2, \quad (42)$$

where  $\lambda$  is an arbitrary constant chosen as  $\lambda \geq 1$  and  $x_\mu^*$  denotes the minimizer of  $F_\mu$ . Because  $F_\mu$  is a continuously differentiable function, we could write the time derivative of  $\mathcal{E}_\mu(t)$  as

$$\dot{\mathcal{E}}_\mu(t) = \alpha (F_\mu(X_\mu(t)) - F_\mu(x_\mu^*)) + \alpha t \langle \nabla F_\mu(X_\mu(t)), \dot{X}_\mu(t) \rangle + \lambda \langle A^\top A(X_\mu(t) - x_\mu^*), \dot{X}_\mu(t) \rangle \quad (43)$$

By using the equality of  $A^\top A\dot{X}_\mu(t)$  and  $-\alpha \nabla F_\mu(X_\mu(t))$ , we have

$$\dot{\mathcal{E}}_\mu(t) = -t \|A\dot{X}_\mu(t)\|_2^2 + \alpha (F_\mu(X_\mu(t)) - F_\mu(x_\mu^*)) - \lambda \alpha \langle (X_\mu(t) - x_\mu^*), \nabla F_\mu(X_\mu(t)) \rangle \leq 0, \quad (44)$$

where we used the convexity of  $F_\mu$  and nonnegativity of  $(F_\mu(X_\mu(t)) - F_\mu(x_\mu^*))$ ,  $\|A\dot{X}_\mu\|_2$  in the last inequality.

Similar to  $\mathcal{E}_\mu(t)$ , we define the energy functional for  $F(X(t))$  as

$$\mathcal{E}(t) = \alpha t (F(X(t)) - F(x^*)) + \frac{\lambda}{2} \|A(X(t) - x^*)\|_2^2. \quad (45)$$

At time 0, there is an upper bound on  $\mathcal{E}(0)$  as

$$\mathcal{E}(0) = \frac{\lambda}{2} \|A(X(0) - x^*)\|_2^2 \leq \frac{\lambda \sigma_1^2}{2} \|x_0 - x^*\|_2^2. \quad (46)$$

By applying the approximation scheme ( $\mathcal{AS}$ ) argument (details as in Appendix A) as  $\mu \rightarrow 0$  to equation (44), we have for a.e.  $t \geq 0$ ,  $\dot{\mathcal{E}}(t) \leq 0$  and that  $\mathcal{E}(t) \leq \mathcal{E}(0)$ .

In (45), by non-negativity of  $F(X(t)) - F(x^*)$  and  $\|X(t) - x^*\|_2^2$ , we find

$$\frac{\lambda}{2} \|A(X(t) - x^*)\|_2^2 \leq \mathcal{E}(0). \quad (47)$$

Combining with the upper bound of  $\mathcal{E}(0)$  in (46), and by taking  $\lambda = 1$ , we derive for a.e.  $t \geq 0$  that

$$\|X(t) - x^*\|_2 \leq \frac{\sigma_1}{\sigma_d} \|x_0 - x^*\|_2. \quad (48)$$

Using the nonnegativity of all terms in (45) and monotonicity of  $\mathcal{E}(t)$  on a.e.  $t \geq 0$ , we have

$$\alpha t (F(X(t)) - F(x^*)) \leq \mathcal{E}(t) \leq \mathcal{E}(0) \leq \frac{\lambda \sigma_1^2}{2} \|x_0 - x^*\|_2^2 \quad \text{for a.e. } t, \quad (49)$$

which is given by (46). Thus  $(F(X(t)) - F(x^*)) \leq \frac{\sigma_1^2}{2\alpha t} \|x_0 - x^*\|_2^2$  by taking  $\lambda = 1$ .

From (44) and using the convexity of  $F_\mu$ , we have

$$\dot{\mathcal{E}}_\mu(t) \leq \alpha(1 - \lambda)(F_\mu(X_\mu(t)) - F_\mu(x_\mu^*)) - t \|A\dot{X}_\mu(t)\|_2^2. \quad (50)$$

Notice that the two terms in (50) are all negative, we find

$$F_\mu(X_\mu(t)) - F_\mu(x_\mu^*) \leq \frac{-\dot{\mathcal{E}}_\mu(t)}{\alpha(\lambda - 1)} \quad \text{and} \quad t \|A\dot{X}_\mu(t)\|_2^2 \leq -\dot{\mathcal{E}}_\mu(t). \quad (51)$$

By integrating over  $(0, T)$ , the inequalities above give

$$\int_0^T (F_\mu(X_\mu(t)) - F_\mu(x_\mu^*)) dt \leq \frac{\mathcal{E}_\mu(0)}{\alpha(\lambda - 1)}, \quad \int_0^T t \|A\dot{X}_\mu(t)\|_2^2 dt \leq \mathcal{E}_\mu(0). \quad (52)$$

By applying approximation scheme ( $\mathcal{AS}$ ) and plugging in (46), we have

$$\int_0^T (F_\mu(X_\mu(t)) - F_\mu(x_\mu^*)) dt \leq \frac{\lambda \sigma_1^2}{2\alpha(\lambda - 1)} \|x_0 - x^*\|_2^2, \quad \int_0^T t \|A\dot{X}_\mu(t)\|_2^2 dt \leq \frac{\lambda \sigma_1^2}{2} \|x_0 - x^*\|_2^2. \quad (53)$$

Taking the limit when  $\mu \rightarrow 0$ ,  $T \rightarrow \infty$  and choosing  $\lambda \rightarrow \infty$  and  $\lambda = 1$  respectively, we get

$$\int_0^\infty (F(X(t)) - F(x^*)) dt \leq \frac{\sigma_1^2}{2\alpha} \|x_0 - x^*\|_2^2, \quad \int_0^\infty t \|\dot{X}(t)\|_2^2 dt \leq \frac{\sigma_1^2}{2\sigma_d^2} \|x_0 - x^*\|_2^2. \quad (54)$$

This completes our proof. □

### C.3. Proof of Theorem 11

*Proof of Theorem 11.* To analyze Accelerated G-ADMM, we adopt idea similar to proof of Theorem 5. Using strong convexity of the optimization subproblems (12a) and (12b), we know that the sequence  $\{x_k, z_k, u_k, \hat{u}_k, \hat{z}_k\}$  is unique. Together with (12c), we have from the first-order optimality conditions of (12a) and (12b) that

$$\partial f(x_{k+1}) + \rho A^T (Ax_{k+1} - \hat{z}_k + \hat{u}_k) \ni 0, \quad (55a)$$

$$\frac{1}{\rho} \partial g(z_{k+1}) - (\alpha Ax_{k+1} + (1 - \alpha)\hat{z}_k - z_{k+1} + \hat{u}_k) \ni 0, \quad (55b)$$

$$u_{k+1} - (\alpha Ax_{k+1} + (1 - \alpha)\hat{z}_k - z_{k+1} + \hat{u}_k) = 0. \quad (55c)$$

Adding up (55b) and (55c) eliminates the common term  $-(\alpha Ax_{k+1} + (1 - \alpha)\hat{z}_k - z_{k+1} + \hat{u}_k)$  and reduces to a simple  $u$ -update:

$$u_{k+1} \in \frac{1}{\rho} \partial g(z_{k+1}). \quad (56)$$

Taking the continuous limit  $\rho \rightarrow \infty$  gives  $U(t) = 0$ , and hence  $\dot{U}(t) = 0$ ,  $\ddot{U}(t) = 0$ . The idea is similar to the proof of Theorem 5.

Bringing (56) and equation (12d) which is the definition of  $\hat{u}$  into (55a) leads to:

$$\partial f(x_{k+1}) + A^T \partial g(z_k) + \rho A^T (Ax_{k+1} - \hat{z}_k) + \rho \gamma_{k+1} A^T (u_{k+1} - u_k) \ni 0, \quad (57)$$

where again from (55c),

$$(Ax_{k+1} - \hat{z}_k) = \frac{1}{\alpha} [(u_{k+1} - \hat{u}_k) + (z_{k+1} - \hat{z}_k)]. \quad (58)$$

In addition, from equation (12d) and equation (12e), we find that  $u_{k+1} - \hat{u}_k = u_{k+1} - (1 + \gamma_{k+1})u_k + \gamma_{k+1}u_{k-1}$  and  $z_{k+1} - \hat{z}_k = z_{k+1} - (1 + \gamma_{k+1})z_k + \gamma_{k+1}z_{k-1}$ . For  $u_{k+1} - \hat{u}_k$ , we add the term  $u_k - u_k + u_{k-1} - u_{k-1}$  to the right hand side, the resulting equation is a combination of the second order difference and first order difference of the sequence  $\{u_k\}$ :

$$u_{k+1} - \hat{u}_k = (u_{k+1} - 2u_k + u_{k-1}) + (1 - \gamma_{k+1})(u_k - u_{k-1}). \quad (59)$$

Similarly, the equation holds that:

$$z_{k+1} - \hat{z}_k = (z_{k+1} - 2z_k + z_{k-1}) + (1 - \gamma_{k+1})(z_k - z_{k-1}). \quad (60)$$

We note that  $1 - \gamma_k = 1 - \frac{k}{k+r} = \frac{r}{\rho^{1/2}t+r}$ . Taking the limit  $\rho \rightarrow \infty$ , under infinitesimal step sizes, using relationships (58), (59), (60) and the fact that  $\dot{U}(t) = 0$ ,  $\ddot{U}(t) = 0$ , equation (57) becomes:

$$\partial f(X(t)) + A^T \partial g(Z(t)) + \frac{1}{\alpha} A^T \left( \frac{r}{t} \dot{Z}(t) + \ddot{Z}(t) \right) \ni 0. \quad (61)$$

We directly take the  $\rho \rightarrow \infty$  limit in (55c) and conclude

$$Z(t) = AX(t), \quad \dot{Z}(t) = A\dot{X}(t), \quad \ddot{Z}(t) = A\ddot{X}(t).$$

Recalling (21) and combining the above with (61) concludes

$$0 \in \partial F(X(t)) + \left( \frac{1}{\alpha} A^T A \right) (\ddot{X}(t) + \frac{r}{t} \dot{X}(t)),$$

□

#### C.4. Proof of Theorem 12

*Proof of Theorem 12.* Recall that  $x_\mu^*$  is the minimizer of  $F_\mu$ . For each  $\mu > 0$ , consider the energy functional of Moreau-Yosida approximation defined as

$$\mathcal{E}_\mu(t) = t^2 (F_\mu(X_\mu(t)) - F_\mu(x_\mu^*)) + \frac{1}{2\alpha} \left\| A \left( \lambda(X_\mu(t) - x_\mu^*) + t\dot{X}_\mu(t) \right) \right\|_2^2 + \frac{\lambda(r - \lambda - 1)}{2\alpha} \|A(X_\mu(t) - x_\mu^*)\|_2^2 \quad (62)$$

where  $\lambda$  is a constant chosen within  $2 \leq \lambda \leq r - 1$ . Because  $F_\mu$  is a continuously differentiable function, we could write the time derivative of  $\mathcal{E}_\mu(t)$  as

$$\begin{aligned} \dot{\mathcal{E}}_\mu &= 2t(F_\mu(X_\mu(t)) - F_\mu(x_\mu^*)) + t^2 \nabla F_\mu(X_\mu(t))^\top \dot{X}_\mu + \left( \lambda(X_\mu - x_\mu^*) + t\dot{X}_\mu \right)^\top \left( \frac{1}{\alpha} A^\top A \right) \left( (\lambda + 1)\dot{X}_\mu + t\ddot{X}_\mu \right) \\ &\quad + \lambda(r - \lambda - 1)(X_\mu - x_\mu^*)^\top \left( \frac{1}{\alpha} A^\top A \right) \dot{X}_\mu \end{aligned}$$

By using the equality of  $tA^\top A\ddot{X}_\mu$  and  $-rA^\top A\dot{X}_\mu - \alpha t\nabla F_\mu(X_\mu(t))$ , we have

$$\dot{\mathcal{E}}_\mu = -\lambda t (F_\mu(x_\mu^*) - F_\mu(X_\mu(t)) - (x_\mu^* - X_\mu)^\top \nabla F_\mu(X_\mu(t))) - (\lambda - 2)t(F_\mu(X_\mu(t)) - F_\mu(x_\mu^*)) - \frac{(r-1-\lambda)t}{\alpha} \|A\dot{X}_\mu\|_2^2 \leq 0 \quad (63)$$

where we used the convexity of  $F_\mu$  and nonnegativity of  $F_\mu(X_\mu(t)) - F_\mu(x_\mu^*)$ ,  $\|A\dot{X}_\mu\|_2$  in the last inequality.

Similar to  $\mathcal{E}_\mu(t)$ , we define the energy functional for  $F(X(t))$  as

$$\mathcal{E}(t) = t^2(F(X(t)) - F(x^*)) + \frac{1}{2\alpha} \left\| A \left( \lambda(X(t) - x^*) + t\dot{X}(t) \right) \right\|_2^2 + \frac{\lambda(r-\lambda-1)}{2\alpha} \|A(X(t) - x^*)\|_2^2$$

At time  $t_0$ , there is an upper bound on  $\mathcal{E}(t_0)$  as

$$\mathcal{E}(t_0) = t_0^2(F(x_0) - F(x^*)) + \frac{\lambda(r-1)}{2\alpha} \|A(x_0 - x^*)\|_2^2 \leq \frac{2\alpha + \lambda(r-1)\sigma_1^2}{2\alpha} \Delta_0^2 \quad (64)$$

By non-negativity of  $F_\mu(X_\mu(t)) - F_\mu(x_\mu^*)$ ,  $\|X_\mu - x_\mu^*\|_2^2$  and  $\|\dot{X}_\mu\|_2^2$ , we find for all  $r \geq 3$  and  $t \geq t_0$  that

$$\frac{d}{dt}(t\|X_\mu - x_\mu^*\|_2^2) = \|X_\mu - x_\mu^*\|_2^2 + 2t(X_\mu - x_\mu^*)^\top \dot{X}_\mu \leq \frac{1}{2} \|2(X_\mu - x_\mu^*) + t\dot{X}_\mu\|_2^2 \leq \frac{\alpha\mathcal{E}_\mu}{\sigma_d^2} \leq \frac{\alpha\mathcal{E}_\mu(t_0)}{\sigma_d^2}$$

By integrating over  $(t_0, t)$ , this gives us

$$t\|X_\mu - x_\mu^*\|_2^2 - t_0\|x_0 - x_\mu^*\|_2^2 \leq \frac{\alpha(t-t_0)}{\sigma_d^2} \mathcal{E}_\mu(t_0)$$

By applying the approximation scheme ( $\mathcal{AS}$ ) argument (details as in Appendix A) as  $\mu \rightarrow 0$ , we have for a.e.  $t \geq t_0$  that

$$\|X - x^*\|_2^2 \leq \frac{\alpha\mathcal{E}(t_0)}{\sigma_d^2} + \|x_0 - x^*\|_2^2$$

Combining with the upper bound of  $\mathcal{E}(t_0)$  in (64), we derive for a.e.  $t \geq t_0$  that

$$\|X(t) - x^*\|_2 \leq C_1 \Delta_0 \quad (65)$$

with factor  $C_1 = \sqrt{\frac{\alpha+(r-1)\sigma_1^2+\sigma_d^2}{\sigma_d^2}}$ . Here we choose  $\lambda = 2$  to minimize  $C_1$ .

From (63), we know that  $\mathcal{E}_\mu(t)$  is nonincreasing for  $t \geq t_0$ , for all  $\mu > 0$ . By applying ( $\mathcal{AS}$ ) we find that  $\mathcal{E}(t)$  is nonincreasing for a.e.  $t \geq t_0$ . Using the nonnegativity of all three terms in (62) and monotonicity of  $\mathcal{E}(t)$  on a.e.  $t \geq t_0$ , we have for a.e.  $t \geq t_0$  that

$$F(X(t)) - F(x^*) \leq \frac{1}{t^2} \mathcal{E}(t) \leq \frac{1}{t^2} \mathcal{E}(t_0) \leq \frac{C_2}{t^2} \Delta_0^2$$

where factor  $C_2 = 1 + (r-1)\sigma_1^2/\alpha$  is given by (64) with  $\lambda = 2$ , and

$$\|\lambda(X(t) - x^*) + t\dot{X}\|_2^2 \leq \frac{2\alpha}{\sigma_d^2} \mathcal{E}(t) \leq \frac{2\alpha}{\sigma_d^2} \mathcal{E}(t_0) \leq \frac{2\alpha + \lambda(r-1)\sigma_1^2}{\sigma_d^2} \Delta_0^2$$

Therefore, by triangle inequality and (65),

$$\|\dot{X}(t)\|_2 \leq \frac{1}{t} \|\lambda(X(t) - x^*) + t\dot{X}(t)\|_2 + \frac{1}{t} \lambda \|X(t) - x^*\|_2 \leq \frac{C_3}{t} \Delta_0$$

with factor  $C_3 = \sqrt{\frac{2\alpha+2(r-1)\sigma_1^2}{\sigma_d^2}} + 2C_1$ . Here we choose  $\lambda = 2$  to minimize  $C_3$ .

From (63), we have

$$\dot{\mathcal{E}}_\mu \leq -(\lambda - 2)t(F_\mu(X_\mu(t)) - F_\mu(x_\mu^*)) - \frac{(r-1-\lambda)t}{\alpha} \|A\dot{X}_\mu\|_2^2$$



when  $r = 3$ , we could only choose  $\lambda = 2 = r - 1$  and the right hand side of the inequality above is always zero. However, if we further assume  $r > 3$ , then we could choose  $\lambda = r - 1$  and  $\lambda = 2$  respectively, such that

$$t(F_\mu(X_\mu(t)) - F_\mu(x_\mu^*)) \leq -\frac{1}{r-3}\dot{\mathcal{E}}_\mu \quad \text{and} \quad t\|\dot{X}_\mu\|_2^2 \leq -\frac{\alpha}{(r-3)\sigma_d^2}\dot{\mathcal{E}}_\mu$$

By integrating over  $(t_0, \infty)$ , the inequalities above give

$$\int_{t_0}^{\infty} t(F_\mu(X_\mu(t)) - F_\mu(x_\mu^*))dt \leq \frac{\mathcal{E}_\mu(t_0)}{r-3} \quad \text{and} \quad \int_{t_0}^{\infty} t\|\dot{X}_\mu(t)\|_2^2 dt \leq \frac{\alpha\mathcal{E}_\mu(t_0)}{(r-3)\sigma_d^2}$$

By applying (AS) and plugging in (64), we have

$$\int_{t_0}^{\infty} t(F(X(t)) - F(x^*))dt \leq C_4\Delta_0^2 \quad \text{and} \quad \int_{t_0}^{\infty} t\|\dot{X}(t)\|_2^2 dt \leq C_5\Delta_0^2$$

with factors  $C_4 = \frac{2\alpha+(r-1)^2\sigma_1^2}{2(r-3)\alpha}$  and  $C_5 = \frac{\alpha+(r-1)\sigma_1^2}{(r-3)\sigma_d^2}$ .  $\square$

### C.5. Proof of Theorem 14

*Proof of Theorem 14.* The energy functional we used in Theorem 12 is no longer applicable, because we can not find  $\lambda$  satisfying  $\lambda - 2 \geq 0$  and  $r - 1 - \lambda \geq 0$  simultaneously when  $0 < r < 3$ . Here we consider a new energy functional for the Moreau-Yosida approximation

$$\mathcal{E}_\mu(t) = t^2(F_\mu(X_\mu(t)) - F_\mu(x_\mu^*)) + \frac{1}{2\alpha} \left\| \frac{2r}{3}A(X_\mu(t) - x_\mu^*) + tA\dot{X}_\mu(t) \right\|_2^2 + \frac{r(3-r)}{9\alpha} \|A(X_\mu(t) - x_\mu^*)\|_2^2 \quad (66)$$

By taking its time derivative, we have

$$\begin{aligned} \dot{\mathcal{E}}_\mu = & 2t(F_\mu(X_\mu(t)) - F_\mu(x_\mu^*)) + t^2\nabla F_\mu(X_\mu(t))^\top \dot{X}_\mu + \left( \frac{2r}{3}(X_\mu - x_\mu^*) + t\dot{X}_\mu \right)^\top \left( \frac{1}{\alpha}A^\top A \right) \left( \left( \frac{2r}{3} + 1 \right)\dot{X}_\mu + t\ddot{X}_\mu \right) \\ & + \frac{2r(3-r)}{9}(X_\mu - x_\mu^*)^\top \left( \frac{1}{\alpha}A^\top A \right) \dot{X}_\mu \end{aligned}$$

By using the equality of  $tA^\top A\ddot{X}_\mu$  and  $-rA^\top A\dot{X}_\mu - \alpha t\nabla F_\mu(X_\mu)$  and applying the convexity of  $F_\mu$ , we have

$$\dot{\mathcal{E}}_\mu \leq \frac{2(3-r)}{3}t(F_\mu(X_\mu(t)) - F_\mu(x_\mu^*)) + \frac{4r(3-r)}{9\alpha}(X_\mu - x_\mu^*)^\top A^\top A\dot{X}_\mu + \frac{3-r}{3\alpha}t\|A\dot{X}_\mu\|_2^2$$

Although this energy functional does not have nonnegative derivative, there is a special relationship between it and its derivative. We notice that

$$\dot{\mathcal{E}}_\mu - \frac{2(3-r)}{3t}\mathcal{E}_\mu \leq -\frac{2r(3-r)(3+r)}{27\alpha t}\|A(X_\mu - x_\mu^*)\|_2^2 \leq 0$$

This implies that, for  $\mathcal{H}_\mu(t) := t^{-\frac{2(3-r)}{3}}\mathcal{E}_\mu(t)$ , for all  $t \geq t_0$ ,

$$\dot{\mathcal{H}}_\mu = t^{-\frac{2(3-r)}{3}} \cdot \left( \dot{\mathcal{E}}_\mu - \frac{2(3-r)}{3t}\mathcal{E}_\mu \right) \leq 0$$

Therefore,  $\mathcal{H}_\mu(t)$  is nonincreasing over  $t \geq t_0$ , for all  $\mu > 0$ . By making similar definition as  $\mathcal{H}(t) := t^{-\frac{2(3-r)}{3}}\mathcal{E}(t)$  and applying the approximation scheme, we have that  $\mathcal{H}(t)$  is nonincreasing for a.e.  $t \geq t_0$ . At time  $t_0$ ,

$$\mathcal{H}(t_0) \leq t_0^{-\frac{2(3-r)}{3}} \cdot \left( 1 + \frac{r(3+r)}{9\alpha}\sigma_1^2 \right) \Delta_0^2$$

By the nonnegativity of all terms in (66) and the monotonicity of  $\mathcal{H}(t)$ , we have for a.e.  $t \geq t_0$  that

$$F(X(t)) - F(x^*) \leq \frac{1}{t^{\frac{2r}{3}}}\mathcal{H}(t) \leq \frac{1}{t^{\frac{2r}{3}}}\mathcal{H}(t_0) \leq \frac{C_6 t_0^{-\frac{2(3-r)}{3}}\Delta_0^2}{t^{\frac{2r}{3}}}$$

with factor  $C_6 = 1 + \frac{r(3+r)\sigma_1^2}{9\alpha}$ .

Similarly, we have for a.e.  $t \geq t_0$  that

$$\left\| \frac{2r}{3}(X(t) - x^*) + t\dot{X} \right\|_2^2 \leq \frac{2\alpha}{\sigma_d^2} t^{\frac{2(3-r)}{3}} \mathcal{H}(t) \leq \frac{2\alpha}{\sigma_d^2} t^{\frac{2(3-r)}{3}} \mathcal{H}(t_0) \leq \frac{2\alpha C_6 t_0^{-\frac{2(3-r)}{3}}}{\sigma_d^2} t^{\frac{2(3-r)}{3}} \Delta_0^2$$

If we also assume the trajectory  $\{X(t)\}_{t \geq t_0}$  is bounded, then by adopting the same interpretation as in Theorem 12, there exists some positive factor  $C_0$  such that, for a.e.  $t \geq t_0$ ,  $\|X(t) - x^*\|_2 \leq C_0 \Delta_0$ . Then triangle inequality gives us, for a.e.  $t \geq t_0$ , that

$$\|\dot{X}\|_2 \leq \frac{1}{t} \left\| \frac{2r}{3}(X(t) - x^*) + t\dot{X} \right\|_2 + \frac{2r}{3t} \|X(t) - x^*\|_2 \leq \frac{C_7 t_0^{-\frac{3-r}{3}} \Delta_0}{t^{\frac{r}{3}}}$$

with factor  $C_7 = \sqrt{\frac{2\alpha C_6}{\sigma_d^2}} + \frac{2r}{3} C_0$ . □
